# Supplementary material for: Formation of macrocyclic lactones in the Paternò–Büchi dimerization reaction
Source: PubMed Central journal article supplement (PMC3063007; doi:10.3762/bjoc.7.35), 2011-02-28
Supplement: Beilstein_J_Org_Chem-07-265-s001.pdf [file Beilstein_J_Org_Chem-07-265-s001.pdf]

# Supporting Information

for

## Formation of macrocyclic lactones in the Paternò– Büchi dimerization reaction

Junya Arimura<sup>1</sup>, Tsutomu Mizuta<sup>1</sup>, Yoshikazu Hiraga<sup>1</sup>, and Manabu Abe\*<sup>1,2</sup>

Address: <sup>1</sup>Department of Chemistry, Graduate School of Science, Hiroshima University (HIRODAI), 1-3-1 Kagamiyama, Higashi-Hiroshima, Hiroshima 739-8526, Japan and

<sup>2</sup>Japan Science and Technology Agency, CREST, 5 Sanbancho, Chiyodaku, Tokyo, 102-0075, Japan

Email: Manabu Abe - mabe@hiroshima-u.ac.jp

\* Corresponding author

**Experimental section for preparation of compounds 1a–c, the detail of the X-ray structure of compound 2a, and <sup>1</sup>H NMR and <sup>13</sup>C NMR spectra for compounds 2a,b.**

## Contents:

|                                                         |       |
|---------------------------------------------------------|-------|
| 1. General Method .....                                 | S2    |
| 2. Preparation of the substrates <b>1a–c</b> .....      | S2–S4 |
| 3. Photoreaction of <b>1a,b</b> .....                   | S4,S5 |
| 4. X-Ray Data of the dimeric product <b>2a</b> .....    | S5,S6 |
| 5. <sup>1</sup> H and <sup>13</sup> C NMR spectra ..... | S7,S8 |
| 6. References .....                                     | S9    |

**General Method:** All reagents were obtained from commercial suppliers and used without further purification. All solvents were distilled over CaH<sub>2</sub> before use. Merck silica gel 60F<sub>254</sub> TLC aluminum sheets were used for routine monitoring of reactions. Column chromatography was performed on Merck silica gel 60 (70-230 mesh, ASTM). Merck silica gel 60F<sub>254</sub> was used for preparative thin-layer chromatography. NMR and MS measurements were made using JEOL JMN-LA500 and LTQ Orbitrap XL, respectively, at the Natural Science Center for Basic Research and Development (N-BARD), Hiroshima University.

**Furan-2-ylmethyl 2-oxo-2-phenylacetate (1a).** To a stirred solution phenylglyoxylic acid (1.59 g, 10.6 mmol) in CH<sub>2</sub>Cl<sub>2</sub>, was added DMAP (1.24 g, 10.1 mmol) and furfuryl alcohol (1.03 g, 10.5 mmol) at 0°C. The mixture was stirred at 0°C for 15min and EDCI HCl (4.19 g, 21.8 mmol) added to the reaction mixture at 0°C, which was then stirred overnight at r.t. The reaction was quenched with water and the product was extracted with CH<sub>2</sub>Cl<sub>2</sub>. The organic layer was washed with water, then brine, dried over Na<sub>2</sub>SO<sub>4</sub>, and concentrated in vacuo. The residue was purified by column chromatography (hexane : EtOAc = 4 : 1) to give **1a** as a yellow oil (701 mg, 29%).

$^1\text{H}$  NMR (500 MHz,  $\text{CDCl}_3$ )  $\delta$  7.97 (dd,  $J = 8.5, 1.2$  Hz, 2 H), 7.68-7.62 (m, 1 H), 7.56-7.44 (m, 3 H), 6.54 (d,  $J = 3.4$  Hz, 1 H), 6.40 (dd,  $J = 3.4, 1.8$  Hz, 1 H), 5.37 (s, 2 H).

**2-(Furan-2-yl)methyl 2-oxo-2-methylacetate (1b).** To stirred pyruvic acid (1.03 g, 11.7 mmol) was added  $\text{MeOCHCl}_2$  (1.00 ml, 11.1 mmol) at 0 °C. The mixture was stirred at 50 °C for 30 min. The byproduct (methyl formate) was removed by evaporation to give 2-oxopropanoyl chloride as a yellow oil which was not further purified. To a stirred solution furfuryl alcohol (822 mg, 8.38 mmol) and pyridine (0.820 ml, 10.1 mmol) in  $\text{CH}_2\text{Cl}_2$ , was added 2-oxopropanoyl chloride (883 mg, 8.29 mmol) and DMAP (108 mg, 0.881 mmol) at 0 °C. The mixture was stirred overnight at r.t. The reaction was quenched with water and the product extracted with  $\text{CH}_2\text{Cl}_2$ . The organic layer was washed with water, then brine and dried over  $\text{Na}_2\text{SO}_4$ . The solvent was removed by evaporation. The residue was purified by column chromatography (hexane : EtOAc = 2 : 1) to give **1b** as a yellow oil (617 mg, 44%).  $^1\text{H}$  NMR (500 MHz,  $\text{CDCl}_3$ )  $\delta$  7.44 (dd,  $J = 1.8, 0.6$  Hz, 1H), 6.49 (d,  $J = 3.3$  Hz, 1H), 6.38 (dd,  $J = 3.3, 1.8$  Hz, 1H), 5.23 (s, 2H), 2.47 (s, 3H);  $^{13}\text{C}$  NMR (125 MHz,  $\text{CDCl}_3$ )  $\delta$  191.3 (C), 160.3 (C), 147.9 (C), 143.8 (CH), 111.9 (CH), 110.7 (CH), 59.5 ( $\text{CH}_2$ ), 26.7 ( $\text{CH}_3$ ); IR (film,  $\text{cm}^{-1}$ ) 3151, 3127, 3016, 2961, 2927, 1734, 1295, 1157, 1018; HRMS (ESI)  $m/z$  calcd for  $\text{C}_8\text{H}_8\text{O}_4\text{Na}$  ( $\text{M} + \text{Na}$ ) $^+$  191.03148, found 191.03174.

**2-(Furan-2-yl)ethyl 2-oxo-2-phenylacetate (1c).** To a stirred phenylglyoxylic acid (1.36 g, 9.05 mmol) in  $\text{CH}_2\text{Cl}_2$ , was added  $\text{MeOCHCl}_2$  (0.820 ml, 9.06 mmol) at 0 °C. The mixture was stirred at 50 °C for 90 min. The solvent and methyl formate (byproduct) were removed by evaporation to give phenylglyoxyl chloride as a yellow oil which was not further purified. To a stirred solution 2-(furan-2-yl)ethanol [1] (505 mg, 4.50 mmol) and pyridine (0.450 ml,

5.56 mmol) in  $\text{CH}_2\text{Cl}_2$ , was added phenylglyoxylyl chloride (1.12 g, 6.64 mmol) and DMAP (67.7 mg, 0.554 mmol) at 0 °C. The mixture was stirred overnight at r.t. The reaction was quenched with water and the product was extracted with  $\text{CH}_2\text{Cl}_2$ . The organic layer was washed with water, then brine and dried over  $\text{Na}_2\text{SO}_4$ . The solvent was removed by evaporation. The residue was purified by column chromatography (hexane : EtOAc = 4 : 1) to give **1c** as a yellow oil (971 mg, 88%).  $^1\text{H}$  NMR (500 MHz,  $\text{CDCl}_3$ ):  $\delta$  7.94 (dd,  $J = 8.2, 0.9$  Hz, 2H), 7.65 (tt,  $J = 7.5, 1.2$ , 1H), 7.49 (t,  $J = 5.3$ , 2H), 7.35 (dd,  $J = 1.8, 0.8$  Hz, 1H), 6.32 (dd,  $J = 3.2, 1.8$  Hz, 1H), 6.14 (dd,  $J = 3.2, 0.7$  Hz, 1H), 4.64 (t,  $J = 6.8$ , 2H), 3.14 (t,  $J = 6.8$ , 2H);  $^{13}\text{C}$  NMR (125 MHz,  $\text{CDCl}_3$ )  $\delta$  186.1 (C), 163.6 (C), 150.9 (C), 141.8 (CH), 134.9 (CH), 132.4 (C), 130.1 (CH), 128.9 (CH), 110.4 (CH), 107.0 (CH), 63.8 ( $\text{CH}_2$ ), 27.6 ( $\text{CH}_2$ ); IR (film,  $\text{cm}^{-1}$ ) 3150, 3122, 3064, 2966, 2907, 1740, 1690, 1200, 1176, 1002; HRMS (ESI)  $m/z$  calcd for  $\text{C}_{14}\text{H}_{12}\text{O}_4\text{Na}$  ( $\text{M} + \text{Na}$ ) $^+$  267.06278, found 267.06296.

**Photoreaction of 1a.** The furfuryl alcohol derivative **1a** was dissolved in benzene (80 mM) and the degassed reaction mixture irradiated with a high-pressure Hg lamp (300 W,  $h\nu > 290$  nm) with a Pyrex filter. After 13 h, solvent was removed in vacuo and dimethyl fumarate added as an internal standard.  $^1\text{H}$  NMR (500 MHz,  $\text{CDCl}_3$ ) was measured to determine the ratio of products. After the photoreaction, the residue was purified by repeated column chromatography and PTLC (hexane : EtOAc = 2 : 1) to give **2a** as colorless crystals. m.p. 151 °C (dec);  $^1\text{H}$  NMR (500 MHz,  $\text{CDCl}_3$ )  $\delta$  7.55–7.51 (m, 4H), 7.40–7.31 (m, 6H), 6.35 (dd,  $J = 3.1, 1.1$  Hz, 2H), 5.28 (dd,  $J = 12.5, 0.9$  Hz, 2H), 4.82 (dt,  $J = 3.0, 0.9$  Hz, 2H), 4.67 (dd,  $J = 3.0, 1.1$  Hz, 2H), 3.71 (d,  $J = 12.5$  Hz, 2H);  $^{13}\text{C}$  NMR (125 MHz,  $\text{CDCl}_3$ )  $\delta$  171.6 (C), 148.7 (CH), 136.0 (CH), 128.6 (CH), 128.4 (CH), 125.7 (CH), 112.6 (C), 102.1 (CH), 90.7 (C), 61.4 ( $\text{CH}_2$ ), 55.2 (CH); IR (KBr,  $\text{cm}^{-1}$ ) 3108,

3080, 2965, 2926, 1743, 1609, 1246, 1136, 1034; HRMS (ESI)  $m/z$  calcd for  $C_{26}H_{20}O_8Na$  ( $M + Na$ )<sup>+</sup> 483.10504, found 483.10526.

**Photoreaction of 1b.** The photoreaction conducted according to the procedure outlined above. After 36 h, triphenylmethane ( $Ph_3CH$ ) was added as an internal standard.  $^1H$  NMR (500 MHz,  $C_6D_6$ ) was measured to determine the ratio of products. After the photoreaction, the residue was purified by repeated column chromatography and PTLC (hexane : EtOAc = 4 : 1) to give **2b** as colorless crystals. m.p. 137 °C (dec);  $^1H$  NMR (500 MHz,  $CDCl_3$ ):  $\delta$  6.66 (dd,  $J = 3.0, 1.2$  Hz, 2H), 5.23 (dt,  $J = 3.0, 0.8$  Hz, 2H), 5.14 (dd,  $J = 12.5, 0.8$  Hz, 2H), 4.27 (dd,  $J = 3.0, 1.2$  Hz, 2H), 3.77 (d,  $J = 12.5$  Hz, 2H), 1.57 (s, 6H);  $^{13}C$  NMR (125 MHz,  $CDCl_3$ )  $\delta$  173.3 (C), 149.8 (CH), 112.7 (C), 101.3 (CH), 88.1 (C), 61.5 ( $CH_2$ ), 53.1 (CH), 21.2 ( $CH_3$ ); IR (KBr,  $cm^{-1}$ ) 3121, 3113, 2981, 2961, 2931, 1742, 1610, 1241, 1121, 1008; HRMS (ESI)  $m/z$  calcd for  $C_{16}H_{16}O_8Na$  ( $M + Na$ )<sup>+</sup> 359.07374, found 359.07391.

#### X-Ray Data of the dimeric product 2a.

|                      |                                                                                                       |
|----------------------|-------------------------------------------------------------------------------------------------------|
| Chemical formula     | $C_{26}H_{20}O_8$                                                                                     |
| Formula weight       | 460.42                                                                                                |
| Temperature          | 173(2) K                                                                                              |
| Wavelength           | 0.71073 Å                                                                                             |
| Crystal size         | 0.05 x 0.20 x 0.22 mm                                                                                 |
| Crystal system       | triclinic                                                                                             |
| Space group          | $P-1$                                                                                                 |
| Unit cell dimensions | $a = 9.2883(9)$ Å $\alpha = 62.3560(10)^\circ$ .<br>$b = 11.2794(11)$ Å $\beta = 89.0080(10)^\circ$ . |

|                                     |                                                              |
|-------------------------------------|--------------------------------------------------------------|
|                                     | $c = 11.6730(12) \text{ \AA}$ $\gamma = 89.8930(10)^\circ$ . |
| Volume                              | 1083.15(19) $\text{\AA}^3$                                   |
| Z                                   | 2                                                            |
| Density (calculated)                | 1.412 $\text{Mg/cm}^3$                                       |
| Absorption coefficient              | 0.106 $\text{mm}^{-1}$                                       |
| F(000)                              | 480                                                          |
| Theta range for data collection     | 1.97 to 25.00°                                               |
| Index ranges                        | -10 ≤ h ≤ 11, -13 ≤ k ≤ 11, -13 ≤ l ≤ 5                      |
| Reflections collected               | 5138                                                         |
| Independent reflections             | 3721 [R(int) = 0.0125]                                       |
| Coverage of independent reflections | 97.7%                                                        |
| Absorption correction               | empirical                                                    |
| Refinement method                   | Full-matrix least-squares on F <sup>2</sup>                  |
| Data / restraints / parameters      | 3721 / 0 / 387                                               |
| Goodness-of-fit on F <sup>2</sup>   | 0.984                                                        |
| Final R indices [I > 2σ(I)]         | R1 = 0.0356, wR2 = 0.1021                                    |
| R indices (all data)                | R1 = 0.0389, wR2 = 0.1060                                    |
| Largest diff. peak and hole         | 0.216 and -0.224 $\text{e.\AA}^{-3}$                         |

<sup>1</sup>H NMR of **2a**, 500 MHz, CDCl<sub>3</sub>

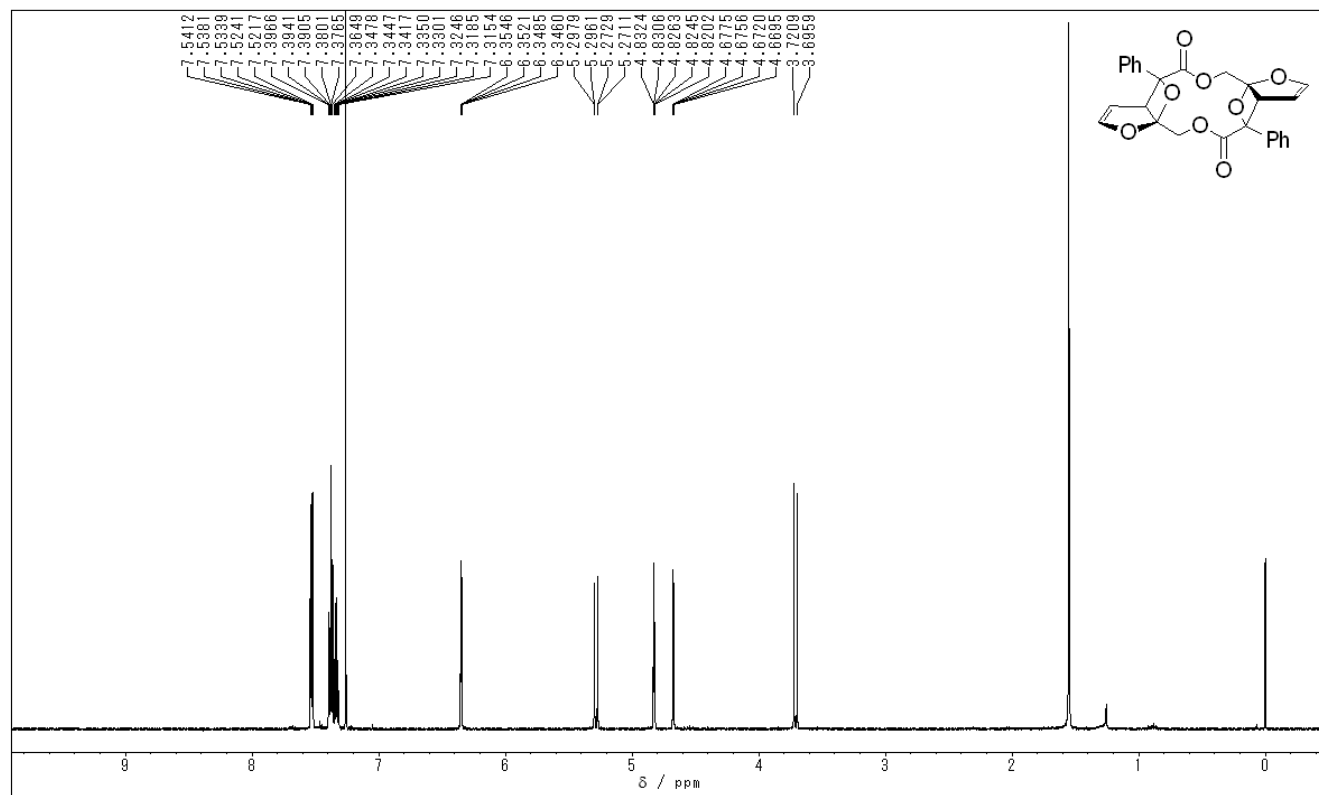

<sup>13</sup>C NMR of **2a**, 125 MHz, CDCl<sub>3</sub> (Upper <sup>13</sup>C NMR, Lower DEPT)

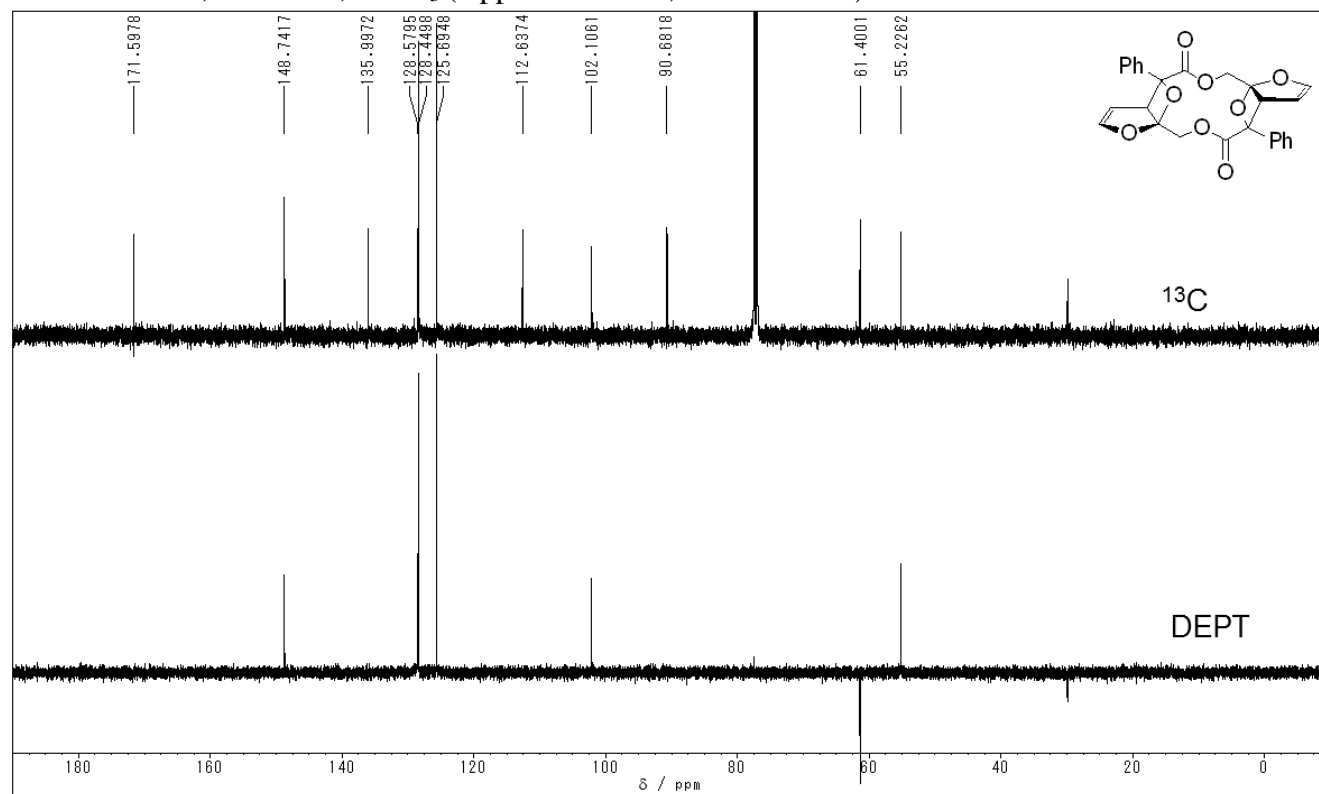

<sup>1</sup>H NMR of **2b**, 500Hz, CDCl<sub>3</sub>

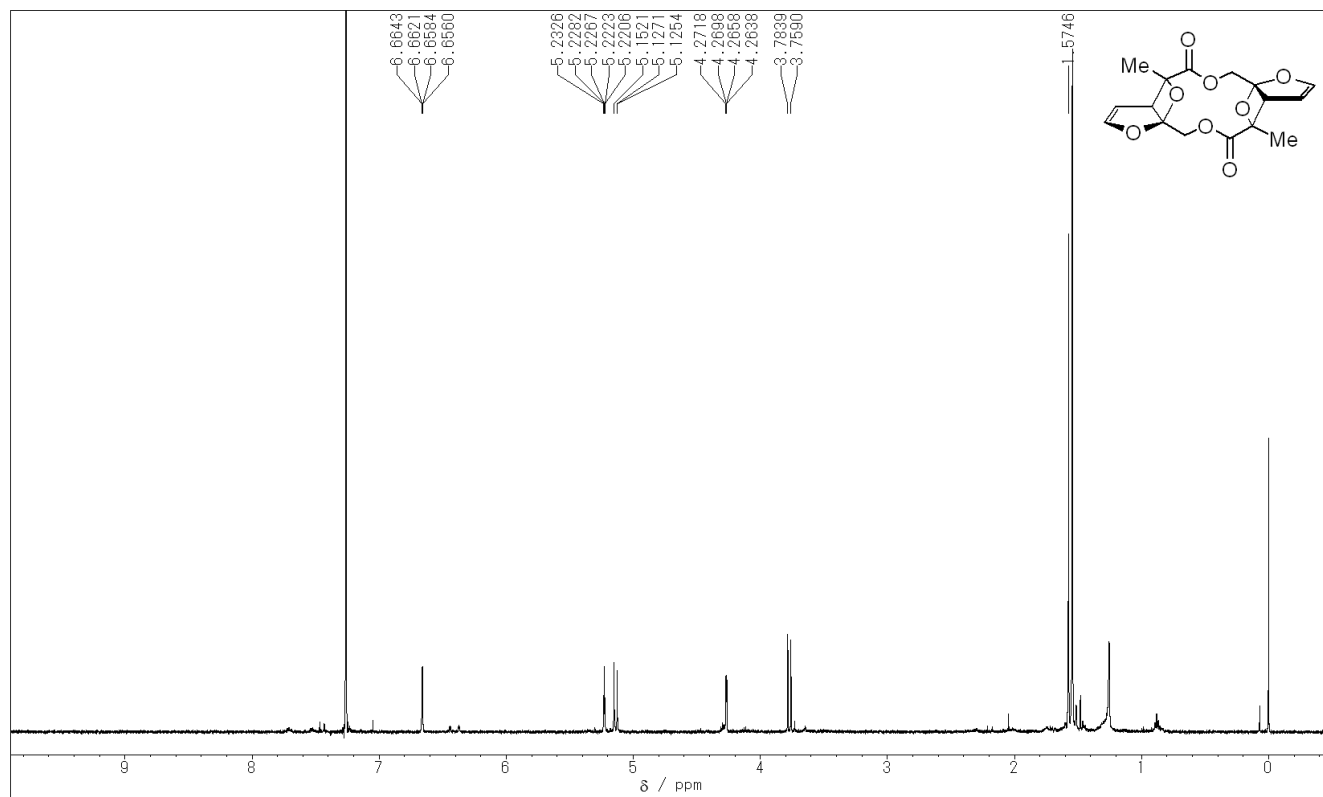

<sup>13</sup>C NMR of **2b**, 125 MHz, CDCl<sub>3</sub> (Upper <sup>13</sup>C NMR, Lower DEPT)

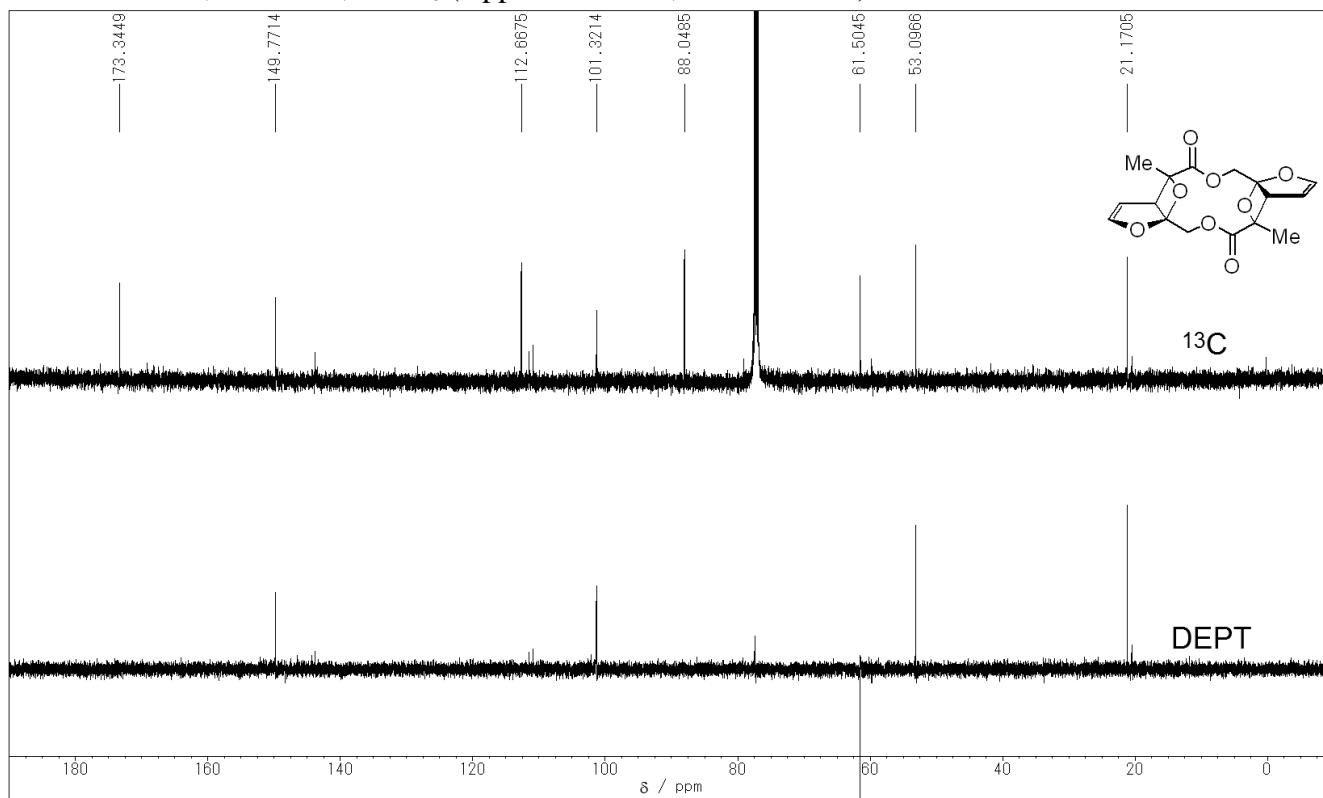



## References

- [1] Loiseau, F.; Simone, J.-M.; Carcache, D.; Bobal, P.; Neier, R. *Monatsh. Chem.* **2007**, *138*, 121–129.
